# Supplementary material
Source: Research Square preprint supplement (doi:10.21203/rs.3.rs-9453228/v1)
Supplement: Supplementary file 1 [file 24edbfc915cb9c85d43fbd47.docx]

**Supplementary Information**

**Adaptive spatial partitioning under the GeoSOT-3D global grid for efficient low-altitude environment modelling**

Qiurong Wang, Zhiyong Liu, and Ningshe Zhao*

**Corresponding author: zhaoningshe@gmail.com*

# **Contents**

• Supplementary Figure S1 — GeoSOT-3D conceptual schematic

• Supplementary Figure S2 — Synthetic low-altitude environment

• Supplementary Figure S3 — Xi'an study area DEM

• Supplementary Figure S4 — Local detail comparison

• Supplementary Table S1 — Comparison of 3D modelling approaches

• Supplementary Table S2 — Real-world data sources

• Supplementary Table S3 — Path-planning performance on the synthetic environment

# **Supplementary Figure S1**


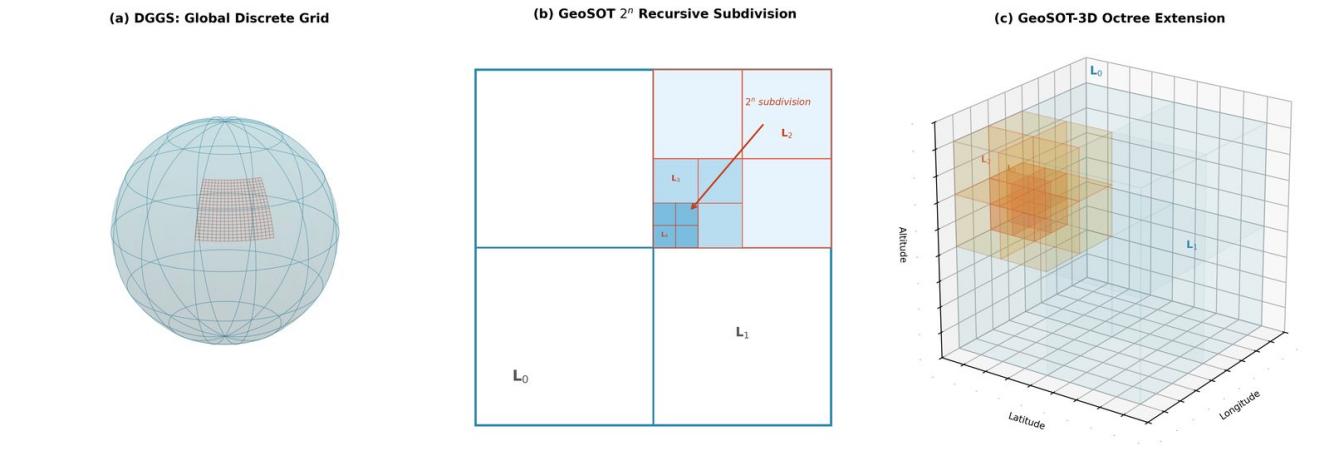


*Supplementary Figure S1. Schematic of DGGS models. (a) hierarchical surface cells; (b) GeoSOT 2ⁿ quadtree from L₀ to L₄; (c) GeoSOT-3D octree voxel extension. The TSDP framework operates on the planar quadtree shown in (b); volumetric extension to the octree in (c) is left to future work.*

# **Supplementary Figure S2**


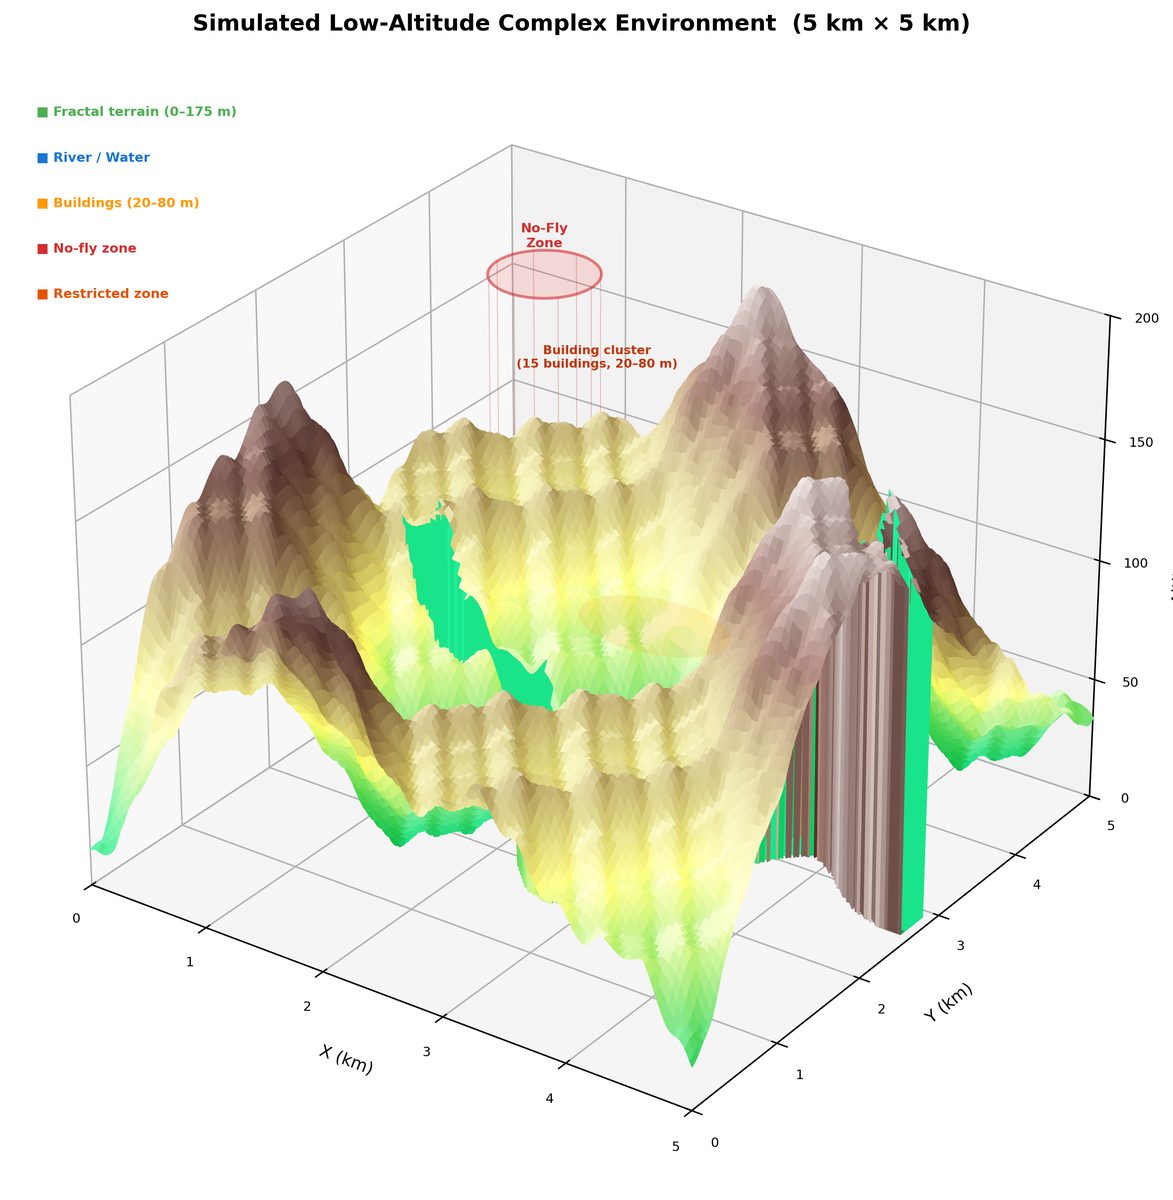


*Supplementary Figure S2. Synthetic low-altitude environment used for benchmarking. The scene spans 5 × 5 km horizontally and 0–180 m in altitude, including fractal-noise terrain with 175 m relief, 15 randomly placed buildings (20–80 m), one no-fly zone, one restricted flight zone, and one river.*

# **Supplementary Figure S3**


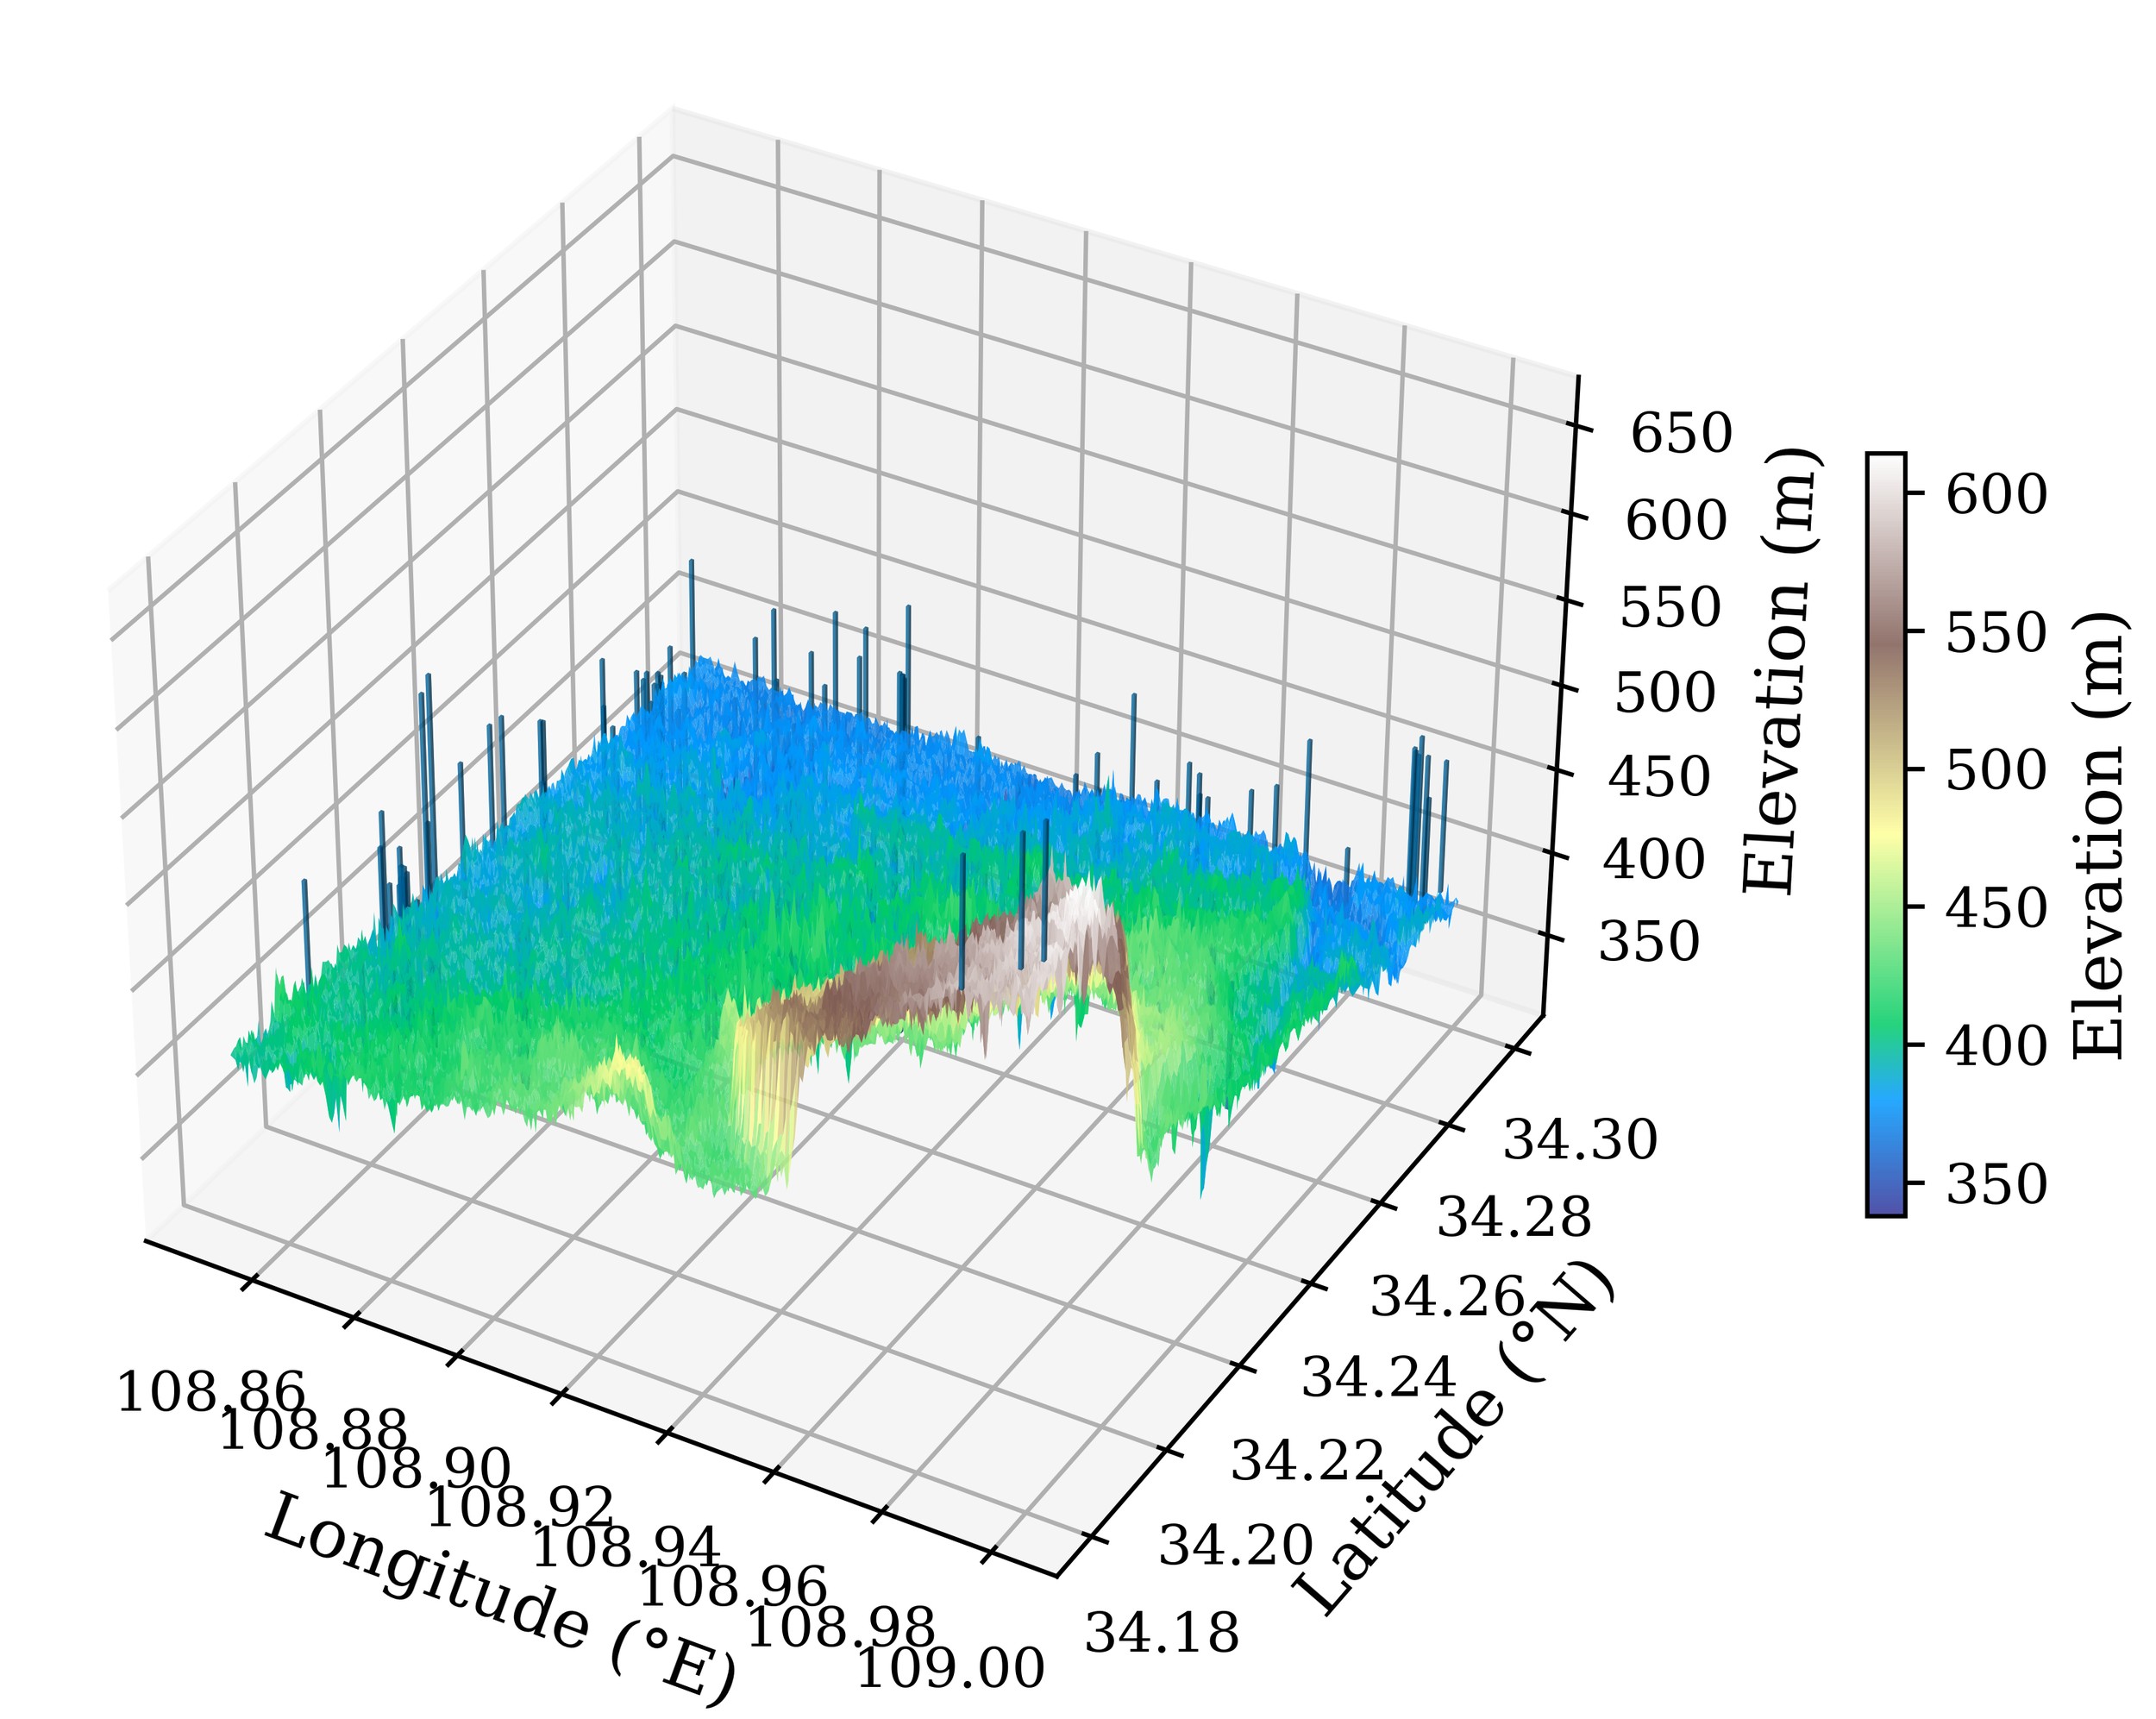


*Supplementary Figure S3. 3D terrain visualisation of the Xi'an study area, derived from ASTER GDEM V3. The study extent covers 108.85°–109.00° E and 34.18°–34.30° N. Vertical bars overlaid on the terrain represent buildings (the bar height is the building height plus terrain elevation). Elevations range from approximately 350 m in the central depression to over 600 m in the peripheral elevated regions, providing a typical mixed-relief low-altitude environment.*

# **Supplementary Figure S4**


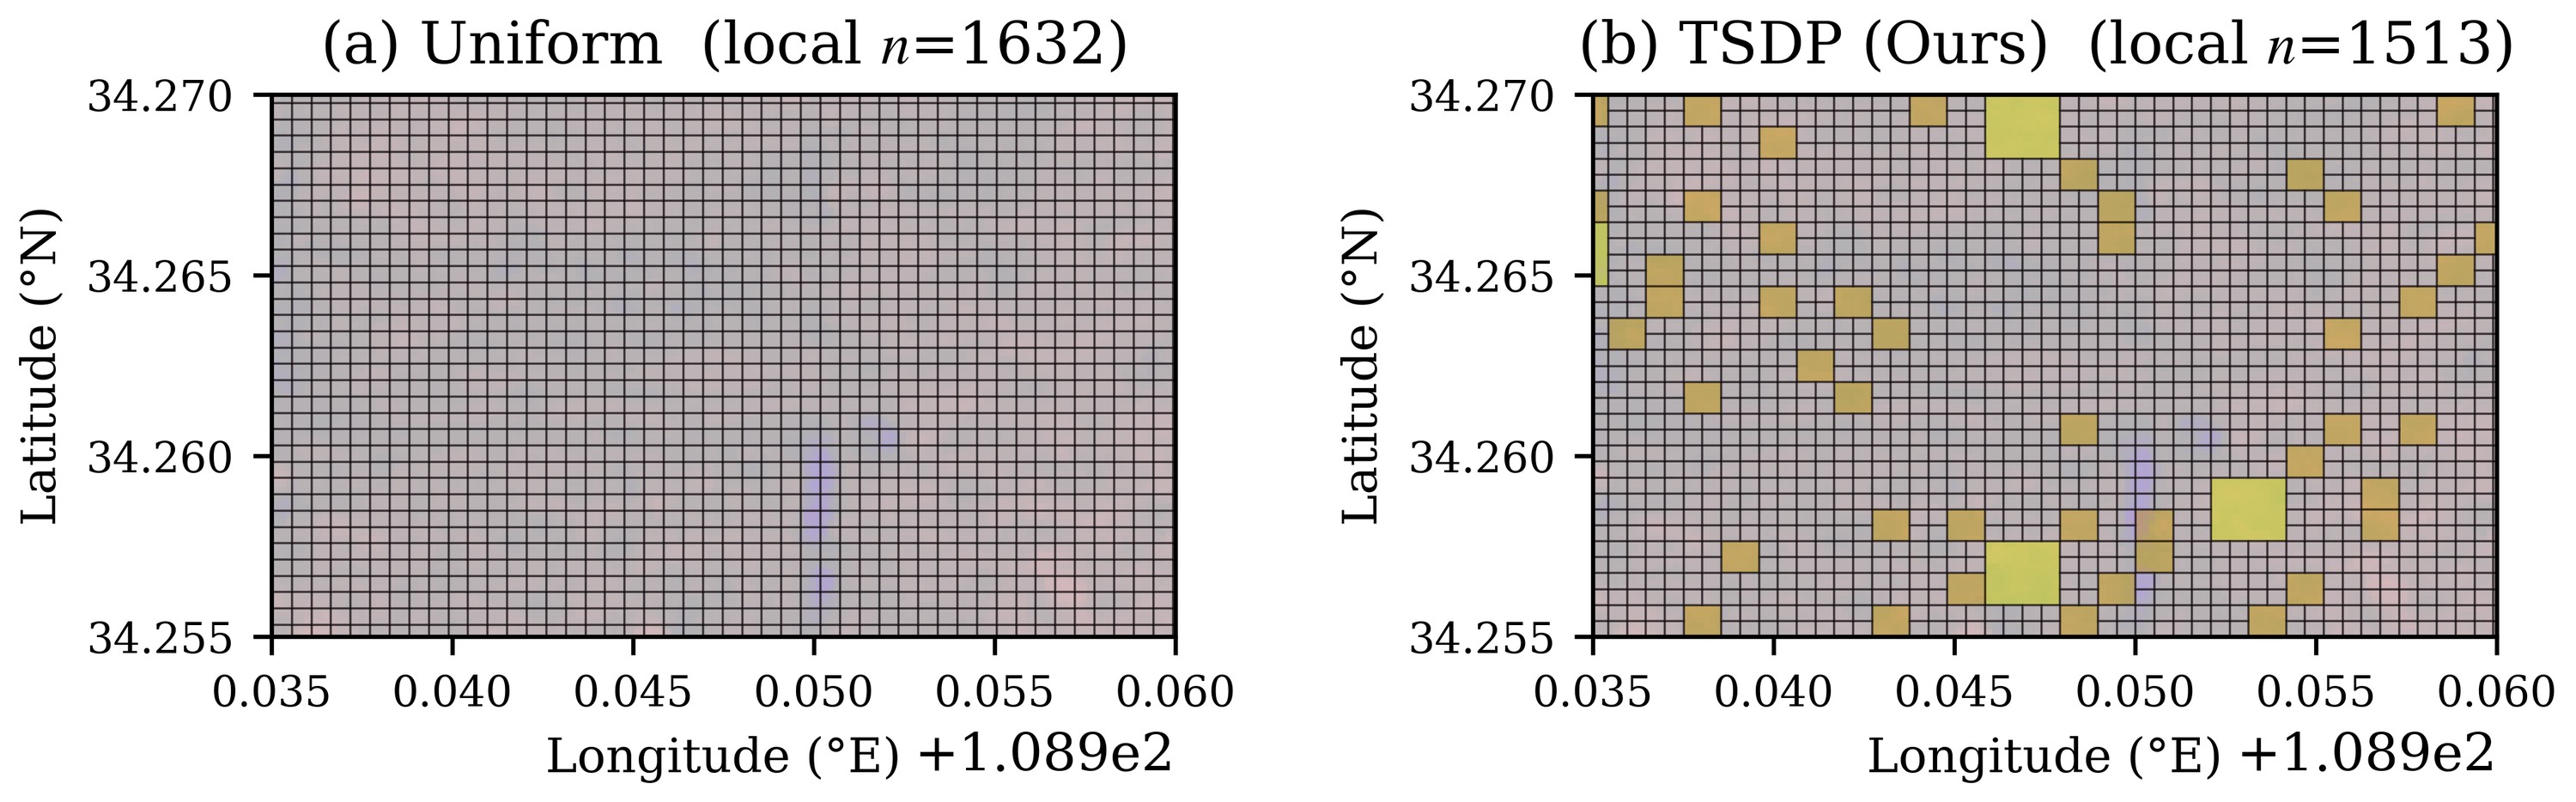


*Supplementary Figure S4. Local detail comparison within a sub-area of the Xi'an scene (108.935°–108.960° E, 34.255°–34.270° N). (a) Uniform grid, local count n = 1,632; (b) TSDP, local count n = 1,513. Yellow cells in (b) are coarse merged voxels (L7 or shallower) generated by TSDP's bottom-up merging phase in flat sub-regions. TSDP achieves comparable local representation with fewer voxels by concentrating refinement only where terrain or semantic complexity warrants it.*

# **Supplementary Table S1**

*Supplementary Table S1. Qualitative comparison of 3D modelling approaches for low-altitude environments. Categorical assessments (Excellent / Good / Moderate / Limited / Poor) reflect the typical performance reported in the cited literature for representative implementations.*

| **Method** | **Global frame** | **Geometric adaptivity** | **Semantic integration** | **Efficiency** | **Main limitation** |
| --- | --- | --- | --- | --- | --- |
| Regular global grid | Excellent | Poor | Limited | Excellent | Fixed resolution |
| AMR | Limited | Excellent | Limited | Good | Continuous fields only |
| Reality 3D model | Good | Excellent | Poor | Poor | Large data volume |
| Point-cloud voxels | Good | Poor | Good | Good | Fixed resolution |
| Semantic vector | Good | Excellent | Excellent | Poor | Complex topology |
| CityGML LOD | Good | Good | Excellent | Moderate | No global grid fusion |

# **Supplementary Table S2**

*Supplementary Table S2. Data sources used in the real-world Xi'an experiment.*

| **Data** | **Source** | **Resolution** | **Access** |
| --- | --- | --- | --- |
| Elevation | ASTER GDEM V3 | 30 m; RMSE ≈ 8.68 m | NASA Earthdata |
| Buildings | OpenStreetMap | Vector (~4,200 footprints) | Overpass API |
| Airspace | eAIP / DJI FlySafe | ≈ 50–100 m | Public + manual |
| Waterways | OpenStreetMap | Vector | Overpass API |

# **Supplementary Table S3**

*Supplementary Table S3. Path-planning performance on the synthetic environment, averaged over 30 repetitions with randomised start–goal pairs. Values after ± denote s.d.*

| **Metric** | **Uniform** | **Terrain-AMR** | **TSDP** |
| --- | --- | --- | --- |
| Time (s) | 2.37 ± 0.19 | 1.65 ± 0.13 | 1.42 ± 0.11 |
| Expanded nodes | 15,832 | 8,945 | 7,590 |
| Path length (m) | 6,842 | 6,715 | 6,698 |
| Min. clearance (m) | 4.2 ± 1.8 | 5.1 ± 2.0 | 8.5 ± 1.4 |
| Clearance violations (<5 m) | 3 | 2 | 0 |

TSDP reduces planning time by 40.1% relative to the uniform baseline (p = 0.0002), increases minimum obstacle clearance from 4.2 m to 8.5 m, and produces zero clearance violations across all 30 repetitions. Path lengths differ by less than 2% across methods, confirming that the safety improvements do not come at the cost of route efficiency.
